# Supplementary material for: Immune Modifying Effect of Drug Free Biodegradable Nanoparticles on Disease Course of Experimental Autoimmune Neuritis
Source: MDPI journal article supplement (doi:10.3390/pharmaceutics14112410), 2022-11-08
Supplement: s1 [file s1]

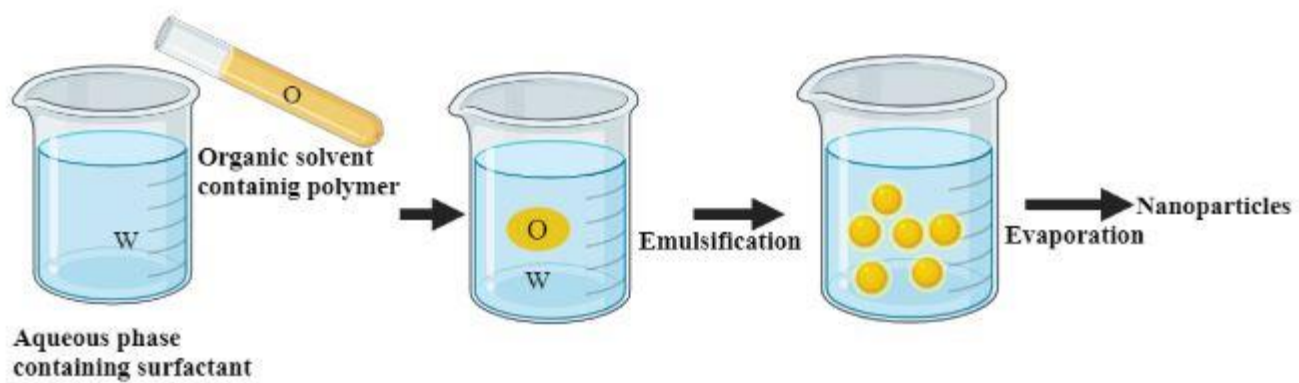

Figure S1. Schematic presentation of nanoparticle preparation using an oil-in-water emulsification evaporation method.
